# Supplementary material
Source: PubMed Central journal article supplement (PMC6162060)
Supplement: NIHMS1503998-supplement-Supplement1.pdf [file NIHMS1503998-supplement-Supplement1.pdf]

## SUPPLEMENTAL DATA

Fay, K.A., et al.

Comparison of trout hepatocytes and liver S9 fractions as *in vitro* models for predicting hepatic clearance in fish

**Table S1.** Measured substrate concentrations ( $\mu\text{M}$ ; mean  $\pm$  SD) across studies

|                | Hepatocyte in vitro <sup>a</sup> | S9 in vitro <sup>b</sup> | Isolated perfused livers <sup>b</sup> |
|----------------|----------------------------------|--------------------------|---------------------------------------|
| Naphthalene    | 2.70 $\pm$ 0.20                  | 2.37 $\pm$ 0.14          | 2.29 $\pm$ 0.17                       |
| Fluorene       | 0.93 $\pm$ 0.18                  | 0.77 $\pm$ 0.04          | 0.81 $\pm$ 0.24                       |
| Anthracene     | 0.14 $\pm$ 0.01                  | 0.14 $\pm$ 0.01          | 0.14 $\pm$ 0.04                       |
| Phenanthrene   | 1.50 $\pm$ 0.20                  | 1.26 $\pm$ 0.04          | 1.14 $\pm$ 0.16                       |
| Pyrene         | 0.25 $\pm$ 0.02                  | 0.36 $\pm$ 0.03          | 0.27 $\pm$ 0.03                       |
| Benzo[a]pyrene | 0.16 $\pm$ 0.01                  | 0.15 $\pm$ 0.00          | 0.11 $\pm$ 0.01                       |

<sup>a</sup>Present study

<sup>b</sup>Data provided in Nichols et al. [19]

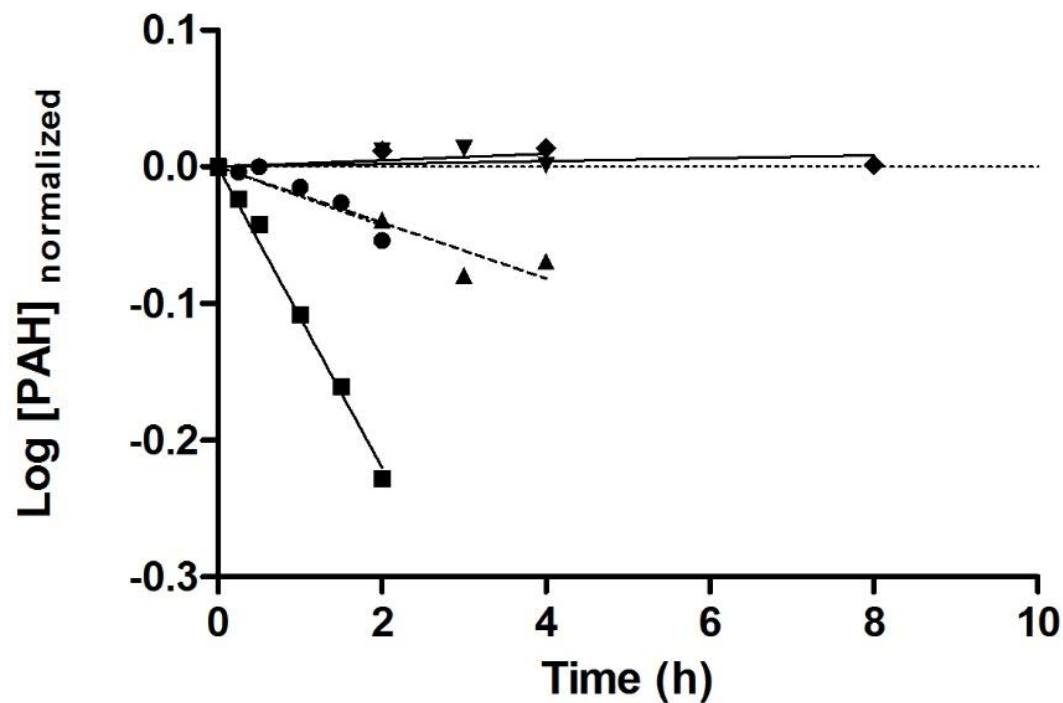

**Figure S1.** Effect of aminobenzotriazole (ABT) and ketoconazole (Ket) on biotransformation activity of hepatocyte suspensions. Enzymatic inhibition using either 1 mM ABT (dots) or 0.5 uM Ket (up triangles) was incomplete, as evidenced by diminished but measurable clearance of fluorene (FLU). The use of 1 mM ABT + 0.5 uM Ket resulted in complete inhibition of fluorene metabolism up to 4 h (down triangles). Data for the active depletion of fluorene by the same lot of hepatocytes (no inhibitors) is also provided (squares). The depletion of benzo[a]pyrene (BAP) was similarly inhibited by the combination of ABT and Ket for up to 8 h (diamonds). BAP was the most rapidly depleted test chemical used in this study.

**Table S2.** Enzymatic characterization of cryopreserved hepatocytes obtained from individual fish, including measured in vitro intrinsic clearance ( $CL_{IN\ VITRO,INT,HEP}$ ) of 6 polycyclic aromatic hydrocarbons

| Cell lot | Sex    | EROD <sup>a</sup> | UGT <sup>b</sup> | GST <sup>b</sup> | $CL_{IN\ VITRO,INT,HEP}$ <sup>c</sup> |      |      |      |      |      |
|----------|--------|-------------------|------------------|------------------|---------------------------------------|------|------|------|------|------|
|          |        |                   |                  |                  | NAPH                                  | FLU  | ANTH | PHEN | PYR  | BAP  |
| 1        | male   | 5.8               | 0.21             | 326              | 0.019                                 | 0.35 | 0.51 | 0.27 | 3.54 | 0.66 |
| 2        | female | 6.4               | 0.32             | 299              | 0.021                                 | 0.19 | 0.30 | 0.18 | 3.13 | 0.57 |
| 3        | male   | 7.6               | 0.3              | 276              | 0.027                                 | 0.38 | 0.16 | 0.18 | 1.57 | 0.51 |
| 4        | female | 5.0               | 0.28             | 239              | 0.033                                 | 0.50 | 0.20 | 0.16 | 1.89 | 0.34 |
| 5        | male   | 3.3               | 0.40             | 227              | 0.013                                 | 0.24 | 0.32 | 0.19 | 3.76 | 0.61 |
| 6        | female | 5.0               | 0.42             | 174              | 0.011                                 | 0.20 | 0.30 | 0.23 | 3.28 | 0.56 |
| 7        | female | 4.2               | 0.31             | 268              | 0.007                                 | 0.27 | 0.38 | 0.23 | 4.70 | 0.61 |
| 8        | male   | 9.1               | 0.25             | 271              | 0.024                                 | 0.36 | 0.35 | 0.22 | 3.63 | 0.41 |
| 9        | male   | 9.9               | 0.29             | 257              | 0.011                                 | 0.18 | 0.33 | 0.27 | 2.43 | 0.57 |

EROD = ethoxyresorufin-*O*-deethylase; UGT = uridine diphosphate (UDP)-glucuronosyltransferase; GST = glutathione-*S*-transferase; NAPH = naphthalene; FLU = fluorene; ANTH = anthracene; PHEN = phenanthrene; PYR = pyrene; BAP = benzo[a]pyrene

<sup>a</sup>(pmol/min/mg); <sup>b</sup>(nmol/min/mg); <sup>c</sup>(mL/h/10<sup>6</sup> cells)
